# Supplementary material for: A two-step strategy for identification of plasma protein biomarkers for endometrial and ovarian cancer
Source: PubMed Central journal article supplement (PMC6271635; doi:10.1186/s12014-018-9216-y), 2018-12-01
Supplement: 12014_2018_9216_MOESM2_ESM.pdf [file 12014_2018_9216_MOESM2_ESM.pdf]

Supplementary Table 2

|                   | CA 125 Arbitrary unit  |                         | CA 125 NPX             |                         |
|-------------------|------------------------|-------------------------|------------------------|-------------------------|
|                   | Benign tumors cohort I | Ovarian cancer cohort I | Benign tumors cohort I | Ovarian cancer cohort I |
| Mean              | 73,74                  | 1059,96                 | 3,51                   | 5,98                    |
| Median            | 16,3                   | 204,15                  | 3,38                   | 6,25                    |
| Range             | 2.9-4631.6             | 6.2-14880.2             | 0.74-7.38              | 1.90-9.03               |
| SD                | 402,38                 | 2333,14                 | 1,30                   | 1,81                    |
| P-value vs benign | NA                     | < 2,2e-16               | NA                     | < 2,2e-16               |
