# Supplementary material for: A two-step strategy for identification of plasma protein biomarkers for endometrial and ovarian cancer
Source: Clin Proteomics. 2018 Dec 1;15:38. doi: 10.1186/s12014-018-9216-y (PMC6271635; doi:10.1186/s12014-018-9216-y)
Supplement: Supplementary file 1 — Additional file 1: Table 1. P-values of individual proteins in the discovery step. [file 12014_2018_9216_MOESM1_ESM.pdf]

Supplementary Table 1

[illegible]



[illegible]
